# Supplementary material
Source: HighWire-hosted journal article supplement (https://jnis.bmj.com/content/neurintsurg-2017-013602)
Supplement: inline-supplementary-material-1 [file inline-supplementary-material-1.docx]

**Supplemental Table 1. Subject Medication and Antiplatelet Use**

| **Medications** |  |
| --- | --- |
| **Baseline medication**  **Heparin**  **Dual antiplatelet therapy**  **Single antiplatelet therapy** | 1 (5.3%)  10 (52.6%)  9 (47.4%) |
| **Procedure medication**  **Heparin**  **Dual antiplatelet therapy**  **Single antiplatelet therapy** | 20 (100%)  1 (5.3%)  7 (36.8%) |
| **Post-procedure medication**  **Heparin**  **Dual antiplatelet therapy**  **Single antiplatelet therapy** | 1 (5.3%)  15 (78.9%)  3 (15.8%) |
